# Supplementary material
Source: PubMed Central journal article supplement (PMC4338587)
Supplement: supp_db14-0333_DB140333SupplementaryData.pdf [file supp_db14-0333_DB140333SupplementaryData.pdf]

SUPPLEMENTARY DATA

**Supplementary Figure 1.** Figures show average annual incidence of diabetes (per 100 person years) for the DPP time period and the DPPOS time period by subgroups of DPP participants at baseline. See methods for definitions of time periods. BMI=body mass index; IFG=impaired fasting glucose; IGT=impaired glucose tolerance, by 1997 American Diabetes Association criteria.

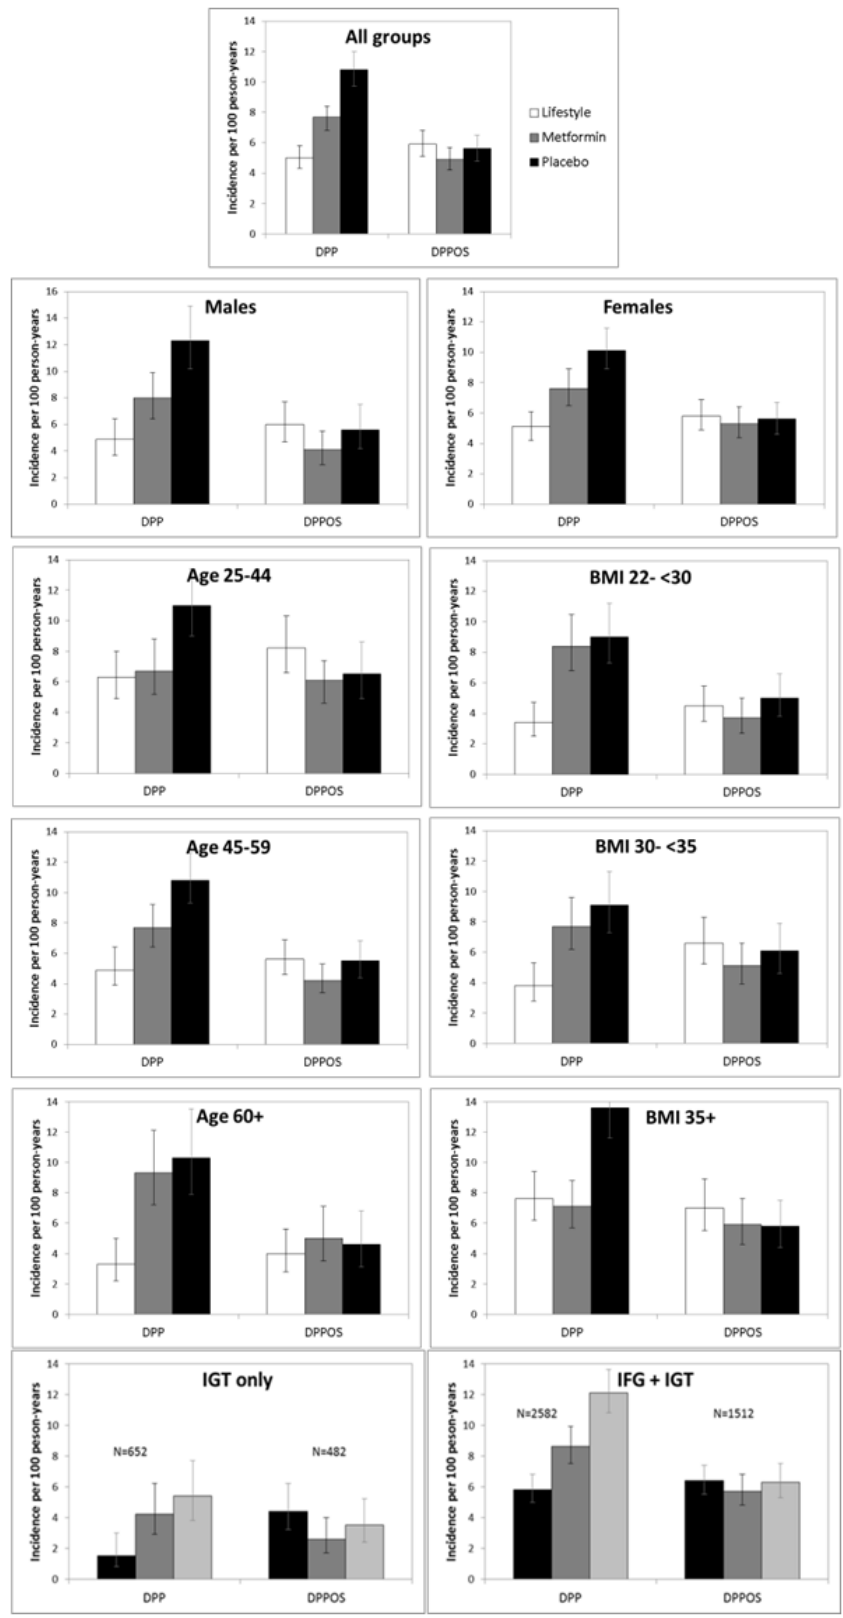

## SUPPLEMENTARY DATA

### DPPOS Research Group Investigators

#### **Pennington Biomedical Research Center (Baton Rouge, LA)**

George A. Bray, MD\*  
Annie Chatellier, RN, CCRC\*\*  
Crystal Duncan, LPN  
Frank L. Greenway, MD  
Erma Levy, RD  
Donna H. Ryan, MD

#### **University of Chicago (Chicago, IL)**

David Ehrmann, MD\*  
Margaret J. Matulik, RN, BSN\*\*  
Kirsten Czech, MS  
Catherine DeSandre, BA

#### **Jefferson Medical College (Philadelphia, PA)**

Barry J. Goldstein, MD, PhD\*  
Kevin Furlong, DO\*  
Kellie A. Smith, RN, MSN\*\*  
Wendi Wildman, RN\*\*

Constance Pepe, MS, RD

#### **University of Miami (Miami, FL)**

Ronald B. Goldberg, MD\*  
Jeanette Calles, MEd\*\*  
Juliet Ojito, RN\*\*  
Sumaya Castillo-Florez, MPH  
Hermes J. Florez, MD, PhD  
Anna Giannella, RD, MS  
Olga Lara  
Beth Veciana

#### **The University of Texas Health Science Center (San Antonio, TX)**

Steven M. Haffner, MD, MPH\*  
Helen P. Hazuda, PhD\*  
Maria G. Montez, RN, MSHP, CDE\*\*  
Carlos Lorenzo, MD, PhD  
Arlene Martinez, RN, BSN, CDE

#### **University of Colorado (Denver, CO)**

Richard F. Hamman, MD, DrPH\*  
Dana Dabelea, MD, PhD\*  
Lisa Testaverde, MS\*\*  
Alexis Bouffard, MA, RN, BSN  
Tonya Jenkins, RD, CDE  
Dione Lenz, RN, BSN, CDE  
Leigh Perreault, MD  
David W. Price, MD  
Sheila C. Steinke, MS

#### **Joslin Diabetes Center (Boston, MA)**

Edward S. Horton, MD\*  
Catherine S. Poirier, RN, BSN\*\*  
Kati Swift, RN, BSN\*\*  
Enrique Caballero, MD  
Barbara Fargnoli, RD  
Ashley Guidi, BS

Mathew Guido, BA  
Sharon D. Jackson, MS, RD, CDE  
Lori Lambert, MS, RD, LD  
Kathleen E. Lawton, RN  
Sarah Ledbury, Med, RD  
Jessica Sansoucy, BS  
Jeanne Spellman, RD

#### **VA Puget Sound Health Care System and University of Washington (Seattle, WA)**

Steven E. Kahn, MB, ChB\*  
Brenda K. Montgomery, RN, BSN, CDE\*\*  
Wilfred Fujimoto, MD  
Robert H. Knopp, MD (deceased)  
Edward W. Lipkin, MD  
Anne Murillo, BS  
Dace Trence, MD

#### **University of Tennessee (Memphis, TN)**

Abbas E. Kitabchi, PhD, MD, FACP\*  
Mary E. Murphy, RN, MS, CDE, MBA\*\*  
William B. Applegate, MD, MPH  
Michael Bryer-Ash, MD  
Samuel Dagogo-Jack, MD, MSc, FRCP, FACP  
Sandra L. Frieson, RN  
Helen Lambeth, RN, BSN  
Lynne C. Lichtermann, RN, BSN  
Hooman Otkaei, MD  
Lily M.K. Rutledge, RN, BSN  
Amy R. Sherman, RD, LD  
Clara M. Smith, RD, MHP, LDN  
Judith E. Soberman, MD  
Beverly Williams-Cleaves, MD

#### **Northwestern University's Feinberg School of Medicine (Chicago, IL)**

Boyd E. Metzger, MD\*  
Mark E. Molitch, MD\*  
Mariana K. Johnson, MS, RN\*\*  
Mimi M. Giles, MS, RD  
Diane Larsen, BS  
Charlotte Niznik, MS, RN, CDE  
Samsam C. Pen, BA  
Pamela A. Schinleber, RN, MS

#### **Massachusetts General Hospital (Boston, MA)**

David M. Nathan, MD\*  
Mary Larkin, MSN\*  
Charles McKittrick, BSN\*\*  
Heather Turgeon, BSN  
Ellen Anderson, MS, RD  
Laurie Bissett, MS, RD  
Kristy Bondi, BS  
Enrico Cagliero, MD  
Kali D'Anna  
Linda Delahanty, MS, RD

## SUPPLEMENTARY DATA

Jose C. Florez, MD, PhD  
Valerie Goldman, MS, RD  
Alexandra Poulos  
Elyse Raymond, BS  
Christine Stevens, RN  
Beverly Tseng

### **University of California-San Diego (San Diego, CA)**

Elizabeth Barrett-Connor, MD\*  
Mary Lou Carrion-Petersen, RN, BSN\*\*  
Lauren N. Claravall, BS  
Jonalle M. Dowden, BS  
Javiva Horne, RD  
Diana Leos, RN, BSN  
Sundar Mudaliar, MD  
Jean Smith, RN  
Simona Szerdi Janisch, BS  
Karen Vejvoda, RN, BSN, CDE, CCRC

### **St. Luke's-Roosevelt Hospital (New York, NY)**

F. Xavier Pi-Sunyer, MD\*  
Jane E. Lee, MS\*\*  
Sandra T. Foo, MD  
Susan Hagamen, MS, RN, CDE

### **Indiana University (Indianapolis, IN)**

David G. Marrero, PhD\*  
Susie M. Kelly, RN, CDE\*\*  
Ronald T. Ackermann, MD  
Edwin S. Fineberg, MD  
Angela Hadden  
Marcia A. Jackson  
Marion S. Kirkman, MD  
Kieren J. Mather, MD  
Paris J. Roach, MD  
Madelyn L. Wheeler, RD

### **Medstar Research Institute (Washington, DC)**

Robert E. Ratner, MD\*  
Vanita Aroda, MD\*  
Sue Shapiro, RN, BSN, CCRC\*\*  
Catherine Bavido-Arrage, MS, RD, LD  
Lilia Leon  
Gabriel Uwaifo, MD  
Debra Wells-Thayer, NP, CDE  
Renee Wiggins, RD

### **University of Southern California/UCLA Research Center (Alhambra, CA)**

Mohammed F. Saad, MD\*  
Karol Watson, MD\*  
Medhat Botrous, MD\*\*  
Sujata Jinagouda, MD\*\*  
Maria Budget  
Claudia Conzues  
Perpetua Magpuri  
Kathy Ngo  
Kathy Xapthalamous

### **Washington University (St. Louis, MO)**

Neil H. White, MD, CDE\*  
Samia Das, MS, MBA, RD, LD\*\*  
Ana Santiago, RD  
Angela L. Brown, MD  
Cormarie Wernimont, RD, LD

### **Johns Hopkins School of Medicine (Baltimore, MD)**

Christopher D. Saudek, MD\* (deceased)  
Sherita Hill Golden, MD, MHS, FAHA\*  
Tracy Whittington, BS\*\*  
Jeanne M. Clark, MD  
Alicia Greene  
Dawn Jiggetts  
Henry Mosley  
John Reusing  
Richard R. Rubin, PhD (deceased)  
Shawne Stephens  
Evonne Utsey

### **University of New Mexico (Albuquerque, NM)**

David S. Schade, MD\*  
Karwyn S. Adams, RN, MSN\*\*  
Claire Hemphill, RN, BSN\*\*  
Penny Hyde, RN, BSN\*\*  
Janene L. Canady, RN, BSN, CDE  
Kathleen Colleran, MD  
Ysela Gonzales  
Doris A. Hernandez-McGinnis  
Carolyn King, MEd

### **Albert Einstein College of Medicine (Bronx, NY)**

Jill Crandall, MD\*  
Janet O. Brown, RN, MPH, MSN\*\*  
Elsie Adorno, BS  
Helena Duffy, MS, C-ANP  
Angela Goldstein, FNP-C, NPP, CSW  
Jennifer Lukin, BA  
Helen Martinez, RN, MSN, FNP-C  
Dorothy Pompei, BA  
Harry Shamoon, MD  
Jonathan Scheindlin, MD  
Elizabeth A. Walker, RN, DNSc, CDE  
Judith Wylie-Rosett, EdD, RD

### **University of Pittsburgh (Pittsburgh, PA)**

Trevor Orchard, MD\*  
Andrea Kriska, PhD\*  
Susan Jeffries, RN, MSN\*\*  
M. Kaye Kramer, BSN, MPH\*\*  
Marie Smith, RN, BSN\*\*  
Catherine Benchoff  
Stephanie Guimond, BS  
Jessica Pettigrew, CMA  
Debra Rubinstein, MD  
Linda Semler, MS, RD  
Elizabeth Venditti, PhD

## SUPPLEMENTARY DATA

Valarie Weinzierl, MPH

**University of Hawaii (Honolulu, HI)**

Richard F. Arakaki, MD\*

Narleen K. Baker-Ladao, BS\*\*

Mae K. Isonaga, RD, MPH\*\*

Nina E. Bermudez, MS

Marjorie K. Mau, MD

**Southwest American Indian Centers (Phoenix,**

**AZ; Shiprock, NM; Zuni, NM)**

William C. Knowler, MD, DrPH\*

Norman Coeoyate\*\*

Mary A. Hoskin, RD, MS\*\*

Camille Natewa\*\*

Carol A. Percy, RN, MS\*\*

Kelly J. Acton, MD, MPH

Vickie L. Andre, RN, FNP

Shandiin Begay, MPH

Brian C. Bucca, OD, FAAO

Sherron Cook

Matthew S. Dougherty, MD

Justin Glass, MD

Martia Glass, MD

Robert L. Hanson, MD, MPH

Doug Hassenpflug, OD

Louise E. Ingraham, MS, RD, LN

Kathleen M. Kobus, RNC-ANP

Jonathan Krakoff, MD

Catherine Manus, LPN

Cherie McCabe

Sara Michaels, MD

Tina Morgan

Julie A. Nelson, RD

Robert J. Roy

Miranda Smart

Darryl P. Tonemah, PhD

Charlton Wilson, MD

**George Washington University Biostatistics**

**Center (DPP Coordinating Center Rockville,**

**MD)**

Sarah Fowler, PhD\*

Marinella Temprosa, PhD\*

Michael D. Larsen, PhD\*

Tina Brenneman\*\*

Hanna Sherif, MS\*\*

Sharon L. Edelstein, ScM\*\*

Solome Abebe, MS

Julie Bamdad, MS

Melanie Barkalow

Joel Bethupu

Tsedenia Bezabeh

Jackie Callaghan

Costas Christophi, PhD

Nicole Butler

Mary Foulkes, PhD

Yuping Gao

Robert Gooding

Adrienne Gottlieb

Nisha Grover

Heather Hoffman, PhD

Kathleen Jablonski, PhD

Richard Katz, MD

Preethy Kolinjivadi, MS

John M. Lachin, ScD

Yong Ma, PhD

Qing Pan, PhD

Susan Reamer

Alla Sapozhnikova

**Lifestyle Resource Core**

Elizabeth M. Venditti, PhD\*

Andrea M. Kriska, PhD

Linda Semler, MS, RD

Valarie Weinzierl, MPH

**Central Biochemistry Laboratory (Seattle, WA)**

Santica Marcovina, PhD, ScD\*

Greg Strylewicz, PhD\*\*

John Albers, PhD

**Epidemiological Cardiology Research Center-**

**Epicare (Winston-Salem, NC)**

Ronald J. Prineas, MD, PhD\*

Teresa Alexander

Charles Campbell, MS

Sharon Hall

Susan Hensley

Yabing Li, MD

Margaret Mills

Elsayed Soliman, MD

Zhuming Zhang, MD

**Fundus Photo Reading Center (Madison, WI)**

Ronald Danis, MD\*

Matthew Davis, MD\*

Larry Hubbard\*

Ryan Endres\*\*

Deborah Elsas\*\*

Samantha Johnson\*\*

Vonnie Gama

Anne Goulding

**Carotid Ultrasound**

Gregory Evans

**CT Scan Reading Center**

Elizabeth Stamm

**Neurocognitive Assessment Group**

Jose A. Luchsinger, MD, MPH

**NIH/NIDDK (Bethesda, MD)**

Judith Fradkin, MD

Sanford Garfield, PhD

**Centers for Disease Control & Prevention**

**(Atlanta, GA)**

Edward Gregg, PhD

## SUPPLEMENTARY DATA

Ping Zhang, PhD

**University of Michigan (Ann Arbor, MI)**

William H. Herman, MD, MPH

Morton B. Brown, PhD

**Nutrition Coding Center (Columbia, SC)**

Elizabeth Mayer-Davis, PhD\*

Robert R. Moran, PhD\*\*

**Quality of Well-Being Center (La Jolla, CA)**

Ted Ganiats, MD\*

Andrew J. Sarkin, PhD\*\*

Naomi Katzir

Erik Groessl, PhD

**Coronary Artery Calcification Reading Center**

Matthew Budoff, MD

Chris Dailing

**Genetics Working Group**

Jose C. Florez, MD, PhD<sup>1,2</sup>

David Altshuler, MD, PhD<sup>1,2</sup>

Liana K. Billings, MD<sup>1</sup>

Ling Chen, MS<sup>1</sup>

Maegan Harden, BS<sup>2</sup>

Robert L. Hanson, MD, MPH<sup>3</sup>

William C. Knowler, MD, DrPH<sup>3</sup>

Toni I. Pollin, PhD<sup>4</sup>

Alan R. Shuldiner, MD<sup>4</sup>

Kathleen Jablonski, PhD<sup>5</sup>

Paul W. Franks, PhD, MPhil, MS<sup>6, 7, 8</sup>

Marie-France Hivert, MD<sup>9</sup>

1=Massachusetts General Hospital

2=Broad Institute

3=NIDDK

4=University of Maryland

5=Coordinating Center

6=Lund University, Sweden

7=Umeå University, Sweden

8=Harvard School of Public Health

9=Université de Sherbrooke

\* denotes Principal Investigator

\*\* denotes Program Coordinator
